# Supplementary material
Source: ML conference proceedings conference paper supplement (https://openreview.net/forum?id=NiQTy0NW1L)
Supplement: supplementary_material [file attachment]

## 474 A Convergence Proof

**Theorem A.1.** *Let  $x_1, \dots, x_n$  be any token sequence generated by an arbitrary language distribution  $p$  with an alphabet of size  $d$ . Let  $p'(x_1, \dots, x_n) = \mathbb{E}_\pi[p(\pi^{-1}(x_1), \dots, \pi^{-1}(x_n))]$ . Then, for any  $0 < \epsilon, \delta < 1/2$ ,*

$$\frac{1}{T} \sum_{t=1}^T \|p(x_t | x_1, \dots, x_{t-1}) - p'(x_t | x_1, \dots, x_{t-1})\|_1 \leq \epsilon$$

475 *with probability greater than  $1 - \delta$  when  $T \geq \frac{d}{\epsilon^4} \text{polylog}(d, \frac{1}{\epsilon}, \frac{1}{\delta})$ .*

476 *Proof.* For any desired error  $0 < \epsilon < 1/2$  and failure rate  $0 < \delta < 1/2$ , we will first prove the analogous  
477 statement for KL divergence instead of  $\mathcal{L}_1$  distance, and then relate a bound on KL divergence back  
478 to  $\mathcal{L}_1$  distance via Pinsker's inequality.

479 Throughout the rest of proof, we will work with a parameter  $\epsilon' < O(\frac{\epsilon}{(\log(1/\delta))^{1/4}}) < \frac{1}{2}$ , and will bound  
480 our KL divergence by  $\epsilon'$ .

To prove the bound in terms of KL divergence, it will be useful to ensure to work with a “smoothed” version of  $p$ , which we denote by  $\tilde{p}$ , for which every token has some nonzero probability,  $\sigma/d$ , of appearing at each timestep, for a parameter  $\sigma = \delta\epsilon'/T$ :

$$\tilde{p}(x_T | x_1, \dots, x_{T-1}) = p(x_T | x_1, \dots, x_{T-1})(1 - \sigma) + \frac{\sigma}{d}.$$

481 Similarly, let  $\tilde{p}'(x_1, \dots, x_n) = \mathbb{E}_\pi[\tilde{p}^{-1}(\pi(x_1), \dots, \pi^{-1}(x_n))]$ . We use  $\tilde{\mathcal{P}}$  to denote the probabilities under  
482 this change. With probability at least  $1 - \sigma T \geq 1 - \epsilon'\delta \geq 1 - \frac{\delta}{2}$ , the realized sequence  $x_1, \dots, x_n$  drawn un-  
483 der  $p$  can be regarded as being drawn from  $\tilde{p}$  (as these distributions can be coupled with this probability).

484 The key idea is then to show that  $\tilde{p}'(y_{t+1} | y_{1:t})$ , where  $y_t = \pi^*(x_t)$  for some ground truth  $\pi^*$   
485 unknown to  $p'$ , is equivalent to using the multiplicative weights algorithm to predict  $y_{t+1}$  with  
486 the Hedge strategy, with the experts being each possible permutation of the tokens and  
487 the cost incurred by each expert being the negative log likelihood of the prediction. We denote  
488  $\tilde{\mathcal{P}}_{\pi'}(y_{1:n}) = \tilde{\mathcal{P}}(y_{1:n} | \pi = \pi') = \tilde{p}(\pi^{-1}(y_1), \dots, \pi^{-1}(y_n))$  and show this in Lemma A.2.

With this equivalence, we can then bound the difference between the prediction of  $p$  and  $p'$  as the regret of the multiplicative weights algorithm. Concretely, we show in Lemma A.3 that the regret of  $p'$  to any expert  $\pi$  is bounded as

$$\frac{1}{T} \sum_t \log \frac{\tilde{\mathcal{P}}_\pi(y_{t+1} | y_{1:t})}{\tilde{p}'(y_{t+1} | y_{1:t})} \leq 2\epsilon'^2$$

489 for  $T \geq (4\log^2(\frac{d}{\sigma})\log(d!))/\epsilon'^4$ .

We can see  $\tilde{p}$  as the particular expert/permutation  $\tilde{\mathcal{P}}_I$ . And we can further only consider the special case that  $\pi^*$  is also the identity permutation, then the same result holds over  $x_t$  and with  $\tilde{\mathcal{P}}_\pi$  replaced by  $\tilde{p}$ , i.e.

$$\frac{1}{T} \sum_t \log \frac{\tilde{p}(x_{t+1} | x_{1:t})}{\tilde{p}'(x_{t+1} | x_{1:t})} \leq 2\epsilon'^2$$

Now we want to convert this bound on regret in terms of log likelihood to KL divergence, and eventually to  $\mathcal{L}_1$  distance. To convert it to KL divergence regret, we construct a martingale:

$$Z_i = \sum_{t=1}^i \left( D_{KL}(\tilde{p}(x_{t+1} | x_{1:t}) \| \tilde{p}'(x_{t+1} | x_{1:t})) - \log \frac{\tilde{p}(x_{t+1} | x_{1:t})}{\tilde{p}'(x_{t+1} | x_{1:t})} \right).$$

490 We verify that this is a martingale in Lemma A.4, with differences bounded by  $2\log \frac{1}{\sigma}$ , and bound the  
491 probability that  $Z_T$  exceeds  $b = \log \frac{d}{\sigma} \sqrt{8T \log \frac{2}{\delta}}$  via Azuma's inequality Lemma A.6: with probability  
492  $1 - \delta/2$ , we have that  $|Z_T| \leq b$ .

Therefore, we have that with probability at least  $1 - \delta/2$

$$Z_T = \sum_{t=1}^T \left( D_{KL}(\tilde{p}(x_{t+1}|x_{1:t}) || \tilde{p}'(x_{t+1}|x_{1:t})) - \log \frac{\tilde{p}(x_{t+1}|x_{1:t})}{\tilde{p}'(x_{t+1}|x_{1:t})} \right) \leq b$$

$$\sum_{t=1}^T D_{KL}(\tilde{p}(x_{t+1}|x_{1:t}) || \tilde{p}'(x_{t+1}|x_{1:t})) \leq \sum_{t=1}^T \left( \log \frac{\tilde{p}(x_{t+1}|x_{1:t})}{\tilde{p}'(x_{t+1}|x_{1:t})} \right) + b$$

Putting this all together, since  $\frac{1}{T} \sum_t \log \frac{\tilde{p}_t(x_{t+1}|x_{1:t})}{\tilde{p}'(x_{t+1}|x_{1:t})} \leq 2\epsilon'^2$  for  $T \geq (4\log^2(\frac{d}{\sigma})\log(d!))/\epsilon'^4$ , we have the following:

$$\sum_1^T D_{KL}(\tilde{p}(x_{t+1}|x_{1:t}) || \tilde{p}'(x_{t+1}|x_{1:t})) \leq 2\epsilon'^2 T + b.$$

We now convert our bound on KL divergence to a bound on  $\mathcal{L}_1$  distance via Pinsker's inequality:

$$\|\tilde{p}(x_{t+1}|x_{1:t}) - \tilde{p}'(x_{t+1}|x_{1:t})\|_1 \leq \sqrt{\frac{1}{2} D_{KL}(\tilde{p}(x_{t+1}|x_{1:t}) || \tilde{p}'(x_{t+1}|x_{1:t}))}.$$

Further, at any given  $x_t$ , the difference between the redistributed probability distribution  $\tilde{p}$  and a unmodified probability distribution  $p$  is at most  $\sigma$ , so

$$\|p(x_{t+1}|x_{1:t}) - p'(x_{t+1}|x_{1:t})\|_1 \leq \|\tilde{p}(x_{t+1}|x_{1:t}) - \tilde{p}'(x_{t+1}|x_{1:t})\|_1 + 2\sigma.$$

We are interested in the average  $\mathcal{L}_1$  across time steps:

$$\begin{aligned} \frac{1}{T} \sum_{t=1}^T \|p(x_{t+1}|x_{1:t}) - p'(x_{t+1}|x_{1:t})\|_1 &\leq \frac{1}{T} \sum_{t=1}^T (\|\tilde{p}(x_{t+1}|x_{1:t}) - \tilde{p}'(x_{t+1}|x_{1:t})\|_1 + 2\sigma) \\ &\leq \frac{1}{T} \sum_{t=1}^T \sqrt{\frac{1}{2} D_{KL}(\tilde{p}(x_{t+1}|x_{1:t}) || \tilde{p}'(x_{t+1}|x_{1:t}))} + 2\sigma \\ &\leq \frac{1}{T} \sqrt{T \sum_{t=1}^T \frac{1}{2} D_{KL}(\tilde{p}(x_{t+1}|x_{1:t}) || \tilde{p}'(x_{t+1}|x_{1:t}))} + 2\sigma, \end{aligned}$$

where in the last inequality we applied Cauchy-Schwarz. Hence for  $T \geq (4\log^2 \frac{d}{\sigma} \log(d!))/\epsilon'^4$ ,

$$\begin{aligned} \frac{1}{T} \sum_{t=1}^T \|p(x_{t+1}|x_1, \dots, x_t) - p'(x_{t+1}|x_1, \dots, x_t)\|_1 &\leq \frac{1}{T} \sqrt{\frac{T}{2} (2\epsilon'^2 T + b)} + 2\sigma \\ &\leq \sqrt{\epsilon'^2 + \frac{b}{2T}} + 2\sigma. \end{aligned}$$

Simplifying this for  $b = \log \frac{d}{\sigma} \sqrt{8T \log \frac{2}{\delta}}$ ,  $T \geq (4\log^2(\frac{d}{\sigma})\log(d!))/\epsilon'^4$  and  $\sigma = \epsilon' \delta / T$ , we have

$$\begin{aligned} \frac{1}{T} \sum_{t=1}^T \|p(x_{t+1}|x_1, \dots, x_t) - p'(x_{t+1}|x_1, \dots, x_t)\|_1 &\leq \sqrt{\epsilon'^2 + \frac{\sqrt{2\log \frac{2}{\delta}}}{\sqrt{\log(d!)}} \epsilon'^2 + \frac{2\epsilon' \delta}{T}} \\ &\leq \epsilon' \left( \frac{2\delta}{T} + \sqrt{1 + \sqrt{\frac{2\log \frac{2}{\delta}}{\log(d!)}}} \right) \\ &\leq \epsilon' (1 + \sqrt{1 + \sqrt{2\log \frac{2}{\delta}}}) \leq \epsilon' 2\sqrt{2} (2\log \frac{2}{\delta})^{1/4}. \end{aligned}$$

We can bound this average  $L_1$  error by  $\epsilon$  if we set  $\epsilon' = \frac{\epsilon}{2\sqrt{2}(2\log \frac{2}{\delta})^{1/4}} < \frac{1}{2}$ , in which case our condition that  $T \geq (4\log^2(\frac{dT}{\delta\epsilon'})\log(d!)) / \epsilon'^4$  becomes  $T \geq (512\log^2 \frac{2}{\delta} \log^2 \frac{dT}{\delta\epsilon'} \log(d!)) / \epsilon^4$ . The theorem now follows by simplifying this expression. Since  $\log \frac{2}{\delta} \leq 2\log \frac{1}{\delta}$ , and  $\log(d!) \leq d\log(d)$ , we can relax the condition on  $T$  as

$$T \geq \left( 1024\log \frac{1}{\delta} \log^2 \left( \frac{d}{\delta\epsilon'} \right) \log^2(T) d\log(d) \right) / \epsilon^4 = \log^2(T) \frac{d}{\epsilon^4} \text{polylog} \left( d, \frac{1}{\epsilon}, \frac{1}{\delta} \right)$$

To remove the  $\log^2 T$  from the right side, note that for any  $W > 10$ , if  $T > 10 W \log^2 W$ , then  $T > W \log^2 T$ , yielding the further relaxed condition on  $T$  as

$$T \geq \frac{d}{\epsilon^4} \text{polylog} \left( d, \frac{1}{\epsilon}, \frac{1}{\delta} \right).$$

501

□

502 **Lemma A.2.** Consider an arbitrary ground truth permutation  $\pi^*$ . For all time steps  $t \in [1, n]$ , let  
 503  $y_t = \pi^*(x_t)$ . Consider the online prediction game of predicting  $y_{t+1}$  at each time step given previous ob-  
 504 servation  $y_{1:t}$  without knowing  $\pi^*$  but knowing  $\tilde{p}$ . Then,  $\tilde{p}'(y_{t+1}|y_{1:t})$  is equivalent to the multiplicative  
 505 weights algorithm's prediction of  $y_{t+1}$  with the Hedge strategy of Freund and Schapire [8], where it

- 506 • Considers  $d!$  experts corresponding to guessing each permutation  $\pi'$  is the ground truth  
 507 permutation.
- 508 • Maintains a weight  $w_{\pi'}^{(t)}$  for each expert at time step  $t$ , and the weights are initially as  $\tilde{P}(\pi)$ .
- 509 • Picks a distribution across experts  $p_{\pi'}^{(t)} = \frac{w_{\pi'}^{(t)}}{\Phi^{(t)}}$  where  $\Phi^{(t)} = \sum_j w_j^{(t)}$ .
- 510 • Produces prediction of  $y_{t+1}$  as  $\sum_{\pi'} p_{\pi'}^{(t)} \tilde{P}_{\pi'}(y_{t+1}|y_{1:t})$
- 511 • Receives a cost vector of  $m_{\pi'}^{(t)} = -\frac{1}{\epsilon} \log \tilde{P}_{\pi'}(y_{t+1}|y_{1:t})$ .
- 512 • Updates the weights  $w_i^{(t+1)} = w_i^{(t)} \exp(-\epsilon m_i^{(t)})$  and repeat

513 *Proof.* We can first see that  $p_{\pi'}^{(t)} = \tilde{P}(\pi'|y_{1:t})$  by induction:

514 Base case:  $p_{\pi'}^{(0)} = \tilde{P}(\pi)$  by assumption.

515 Inductive Case:

516 With the cost vector as  $m_{\pi'}^{(t-1)} = -\frac{1}{\epsilon} \log \tilde{P}_{\pi'}(y_t|y_{1:t-1})$ , the update at step  $t$  is  
 517  $w_{\pi'}^{(t)} = w_{\pi'}^{(t-1)} \tilde{P}_{\pi'}(y_t|y_{1:t-1})$ . Therefore, the probability over any particular expert  $\pi'$  is

$$\begin{aligned} p_{\pi'}^{(t)} &= \frac{w_{\pi'}^{(t)}}{\Phi^{(t)}} \\ &= \frac{w_{\pi'}^{(t-1)} \tilde{P}_{\pi'}(y_t|y_{1:t-1})}{\sum_j w_j^{(t-1)} \tilde{P}_j(y_t|y_{1:t-1})} \\ &= \frac{p_{\pi'}^{(t-1)} \Phi^{(t-1)} \tilde{P}_{\pi'}(y_t|y_{1:t-1})}{\sum_j p_j^{(t-1)} \Phi^{(t-1)} \tilde{P}_j(y_t|y_{1:t-1})} \\ &= \frac{p_{\pi'}^{(t-1)} \tilde{P}_{\pi'}(y_t|y_{1:t-1})}{\sum_j p_j^{(t-1)} \tilde{P}_j(y_t|y_{1:t-1})} \end{aligned}$$

518 This is equivalent to the update given by Bayes' rule when plugging in  $p_{\pi'}^{(t)} = \tilde{P}(\pi'|y_{1:t})$ :

$$\tilde{P}(\pi'|y_{1:t}) = \frac{\tilde{P}(\pi'|y_{1:t-1}) \tilde{P}_{\pi'}(y_t|y_{1:t-1})}{\tilde{P}(y_t|y_{1:t-1})}$$

519 So we can conclude that  $p_{\pi'}^{(t)} = \tilde{\mathcal{P}}(\pi'|y_{1:t})$ , i.e. the process of updating the probability distribution  
 520 across experts within the prediction game is equivalent to the process of the language model updating  
 521 the probabilities  $\tilde{\mathcal{P}}(\pi'|y_{1:t+1})$  across permutations  $\pi'$ . And this means that the algorithm's prediction  
 522  $\sum_{\pi'} p_{\pi'}^{(t)} \tilde{\mathcal{P}}_{\pi'}(y_{t+1}|y_{1:t}) = \sum_{\pi'} \tilde{\mathcal{P}}(\pi'|y_{1:t}) \tilde{\mathcal{P}}_{\pi'}(y_{t+1}|y_{1:t}) = \tilde{\mathcal{P}}(y_{t+1}|y_{1:t}) = \tilde{p}'(y_{t+1}|y_{1:t})$   $\square$

**Lemma A.3.** *When using the Hedge strategy for the multiplicative weights algorithm, the average difference between the weighted distribution across experts and any particular expert  $\pi$  is bounded as*

$$\frac{1}{T} \sum_t \log \frac{\tilde{\mathcal{P}}_{\pi}(y_{t+1}|y_{1:t})}{\tilde{p}'(y_{t+1}|y_{1:t})} \leq 2\epsilon^2$$

523 for  $\epsilon \leq 1$  and for  $T \geq (4\log^2(\frac{d}{\sigma})\log(d!))/\epsilon^4$ .

524 *Proof.* Consider an arbitrary expert  $\pi$ .

525 We first show that the cost vectors are bounded by  $\rho = -\frac{1}{\epsilon} \log \frac{\sigma}{d}$ : Recall we defined  
 526  $m_{\pi}^{(t)} = -\frac{1}{\epsilon} \log \tilde{\mathcal{P}}_{\pi}(y_{t+1}|y_{1:t})$ . By the definition of our redistributed probability distribution,  
 527 at time step  $t \in [1, \dots, T]$ ,

$$\begin{aligned} \frac{\sigma}{d} &\leq \tilde{\mathcal{P}}_{\pi}(y_{t+1}|y_{1:t}) \leq 1 \\ \log \frac{\sigma}{d} &\leq \log \tilde{\mathcal{P}}_{\pi}(y_{t+1}|y_{1:t}) \leq 0 \\ 0 &\leq m_{\pi}^{(t)} \leq -\frac{1}{\epsilon} \log \frac{\sigma}{d} \\ 0 &\leq m_{\pi}^{(t)} \leq -\frac{1}{\epsilon} \log \frac{\sigma}{d}. \end{aligned}$$

528 By corollary 16.3 in [1], if we have cost vectors  $m^{(t)} \in [-\rho, \rho]^{d!}$ , then for time  $T \geq (4\rho^2 \log(d!))/\epsilon^2$   
 529 where  $\epsilon \leq 1$ ,

$$\frac{1}{T} \sum_t p^{(t)} \cdot m^{(t)} \leq \frac{1}{T} \sum_t m_{\pi}^{(t)} + 2\epsilon.$$

530 Note that we can simplify  $T \geq (4\log^2(\frac{d}{\sigma})\log(d!))/\epsilon^4$ .

531 We can now bound

$$\begin{aligned} \frac{1}{T} \sum_t \left( p^{(t)} \cdot m^{(t)} - m_{\pi}^{(t)} \right) &\leq 2\epsilon \\ \frac{1}{T} \sum_t \left( \sum_{\pi'} p_{\pi'}^{(t)} m_{\pi'}^{(t)} - m_{\pi}^{(t)} \right) &\leq 2\epsilon \\ \frac{1}{T} \sum_t \left( \sum_{\pi'} \tilde{\mathcal{P}}(\pi'|y_{1:t}) \left( -\frac{1}{\epsilon} \log \tilde{\mathcal{P}}_{\pi'}(y_{t+1}|y_{1:t}) \right) - \left( -\frac{1}{\epsilon} \log \tilde{\mathcal{P}}_{\pi}(y_{t+1}|y_{1:t}) \right) \right) &\leq 2\epsilon \\ \frac{1}{\epsilon T} \sum_t \sum_{\pi'} \left( \tilde{\mathcal{P}}(\pi'|y_{1:t}) \left( \log \tilde{\mathcal{P}}_{\pi}(y_{t+1}|y_{1:t}) - \log \tilde{\mathcal{P}}_{\pi'}(y_{t+1}|y_{1:t}) \right) \right) &\leq 2\epsilon \\ \frac{1}{T} \sum_t \mathbb{E}_{\pi'} \log \frac{\tilde{\mathcal{P}}_{\pi}(y_{t+1}|y_{1:t})}{\tilde{\mathcal{P}}_{\pi'}(y_{t+1}|y_{1:t})} &\leq 2\epsilon^2 \end{aligned}$$

532 By Jensen's inequality, we also have that

$$\begin{aligned} \frac{1}{T} \sum_t \log \frac{\tilde{\mathcal{P}}_{\pi}(y_{t+1}|y_{1:t})}{\mathbb{E}_{\pi'} \tilde{\mathcal{P}}_{\pi'}(y_{t+1}|y_{1:t})} &\leq 2\epsilon^2 \\ \frac{1}{T} \sum_t \log \frac{\tilde{\mathcal{P}}_{\pi}(y_{t+1}|y_{1:t})}{\tilde{p}'(y_{t+1}|y_{1:t})} &\leq 2\epsilon^2 \end{aligned}$$

533

□

534 **Lemma A.4.** *Let*

$$Z_i = \sum_{t=1}^i \left( D_{KL}(\tilde{\mathcal{P}}_I(x_{t+1}|x_{1:t}) || \tilde{\mathcal{P}}(x_{t+1}|x_{1:t})) - \log \frac{\tilde{\mathcal{P}}_I(x_{t+1}|x_{1:t})}{\tilde{\mathcal{P}}(x_{t+1}|x_{1:t})} \right)$$

535  $Z_i$  is a martingale.536 *Proof.* Consider

$$\begin{aligned} \mathbb{E}_{x_{i+1} \sim \tilde{\mathcal{P}}_I}[Z_i] &= \mathbb{E}_{x_{i+1} \sim \tilde{\mathcal{P}}_I} \left[ \sum_{t=1}^i \left( D_{KL}(\tilde{\mathcal{P}}_I(x_{t+1}|x_{1:t}) || \tilde{\mathcal{P}}(x_{t+1}|x_{1:t})) - \log \frac{\tilde{\mathcal{P}}_I(x_{t+1}|x_{1:t})}{\tilde{\mathcal{P}}(x_{t+1}|x_{1:t})} \right) \right] \\ &= \mathbb{E}_{x_{i+1} \sim \tilde{\mathcal{P}}_I} \left[ D_{KL}(\tilde{\mathcal{P}}_I(x_{i+1}|x_{1:i}) || \tilde{\mathcal{P}}(x_{i+1}|x_{1:i})) - \log \frac{\tilde{\mathcal{P}}_I(x_{i+1}|x_{1:i})}{\tilde{\mathcal{P}}(x_{i+1}|x_{1:i})} + Z_{i-1} \right] \end{aligned}$$

537 Observe that  $Z_{i-1}$  has no dependence on  $x_{i+1}$ .

$$\begin{aligned} \mathbb{E}_{x_{i+1} \sim \tilde{\mathcal{P}}_I}[Z_i] &= \mathbb{E}_{x_{i+1} \sim \tilde{\mathcal{P}}_I} \left[ \mathbb{E}_{x_{i+1} \sim \tilde{\mathcal{P}}_I} \log \frac{\tilde{\mathcal{P}}_I(x_{i+1}|x_{1:i})}{\tilde{\mathcal{P}}(x_{i+1}|x_{1:i})} \right] - \mathbb{E}_{x_{i+1} \sim \tilde{\mathcal{P}}_I} \left[ \log \frac{\tilde{\mathcal{P}}_I(x_{i+1}|x_{1:i})}{\tilde{\mathcal{P}}(x_{i+1}|x_{1:i})} \right] + Z_{i-1} \\ &= Z_{i-1} \end{aligned}$$

538 Therefore,  $Z_i$  is a martingale. □539 **Lemma A.5.**  $|Z_i - Z_{i-1}| \leq c_i$  where  $c_i = 2|\log \frac{d}{\sigma}|$ 540 *Proof.* We have

$$|Z_i - Z_{i-1}| = \left| D_{KL}(\tilde{\mathcal{P}}_I(x_{i+1}|x_{1:i}) || \tilde{\mathcal{P}}(x_{i+1}|x_{1:i})) - \log \frac{\tilde{\mathcal{P}}_I(x_{i+1}|x_{1:i})}{\tilde{\mathcal{P}}(x_{i+1}|x_{1:i})} \right|$$

541 In our redistributed probability distribution  $\tilde{\mathcal{P}}$ , we have  $\frac{\sigma}{d} \leq \tilde{\mathcal{P}}_\pi(x_i|x_{1:i-1}) \leq 1$  for any  $\pi$  at any time  
542  $i$ . Therefore,

$$\log \frac{\sigma}{d} \leq \log \frac{\tilde{\mathcal{P}}_I(x_{i+1}|x_{1:i})}{\tilde{\mathcal{P}}(x_{i+1}|x_{1:i})} \leq \log \frac{d}{\sigma}.$$

543 Also, we can find an upper bound for the KL divergence by maximizing  $\tilde{\mathcal{P}}_I(x_{i+1}|x_{1:i})$  to 1 and  
544 minimizing  $\tilde{\mathcal{P}}(x_{i+1}|x_{1:i})$  to  $\frac{\sigma}{d}$  so that

$$\begin{aligned} D_{KL}(\tilde{\mathcal{P}}_I(x_{i+1}|x_{1:i}) || \tilde{\mathcal{P}}(x_{i+1}|x_{1:i})) &= \sum_{x_{i+1}} \tilde{\mathcal{P}}_I(x_{i+1}|x_{1:i}) \log \frac{\tilde{\mathcal{P}}_I(x_{i+1}|x_{1:i})}{\tilde{\mathcal{P}}(x_{i+1}|x_{1:i})} \\ &\leq \log \frac{d}{\sigma} \end{aligned}$$

545 We can maximize  $|Z_i - Z_{i-1}|$  by maximizing the first term and minimizing the second term,  
546 or vice versa. In the first case,  $|Z_i - Z_{i-1}| \leq |\log \frac{d}{\sigma} - \log \frac{\sigma}{d}| = 2|\log \frac{d}{\sigma}|$ . In the other case,  
547  $|Z_i - Z_{i-1}| \leq |0 - \log \frac{d}{\sigma}| = |\log \frac{d}{\sigma}|$ .548 Therefore,  $|Z_i - Z_{i-1}| \leq c_i$  where  $c_i = 2|\log \frac{d}{\sigma}|$ . □549 **Lemma A.6.** By Azuma's inequality, with probability  $1 - \delta$ , we have that  $\|Z_T\| \leq b$  where  
550  $b = 2\log \frac{d}{\sigma} \sqrt{-8T \log \frac{1}{\delta}}$

551 *Proof.* By Azuma’s inequality, for all positive reals  $b$ ,

$$\begin{aligned} P(Z_T - Z_1 \geq b) &\leq \exp\left(\frac{-b^2}{2\sum_{k=2}^T c_k^2}\right) \\ P(Z_T - Z_1 \leq b) &\geq 1 - \exp\left(\frac{-b^2}{2\sum_{k=2}^T c_k^2}\right) \\ &\geq 1 - \exp\left(\frac{-b^2}{8\sum_{k=2}^T \log^2 \frac{d}{\sigma}}\right) \end{aligned}$$

552 We can rewrite in terms of  $\delta = \exp\left(\frac{-b^2}{8\sum_{k=2}^T \log^2 \frac{d}{\sigma}}\right)$  so

$$\begin{aligned} b &= \sqrt{-\left(8\sum_{k=2}^T \log^2 \frac{d}{\sigma}\right) \log \delta} \\ &\leq \log \frac{d}{\sigma} \sqrt{-8T \log \frac{1}{\delta}} \end{aligned}$$

Therefore,

$$P(Z_T - Z_1 \leq b) \geq 1 - \delta$$

553

□

## 554 B Model Architecture Details

555 In addition, we add a learnable scaling and bias parameter to the result of the embedding layer, so  
556 that the model can still learn to scale it as needed.

## 557 C Convergence on other datasets

558 Figure 7 shows the perplexity of lexinvariant LMs across the three different datasets. Note that Github  
559 converges significantly faster than standard English text like Wiki-40B, since code is more structured  
560 and easier to decipher the token permutation.

## 561 D Code Deciphering Full Examples

562 Java:

```
563 binary_search() z
564     if (high >= low) z
565         mid = (high + low) / 2;
566         if (arr[mid] == x)
567             return mid;
568         if (arr[mid] > x) z
569             high = mid - 1;
570             return binary_search();
571         } else z
572             low = mid + 1;
573             return binary_search();
574     }
575 } else z
576     return -1;
577 }
578 }
579 void func2() z
```

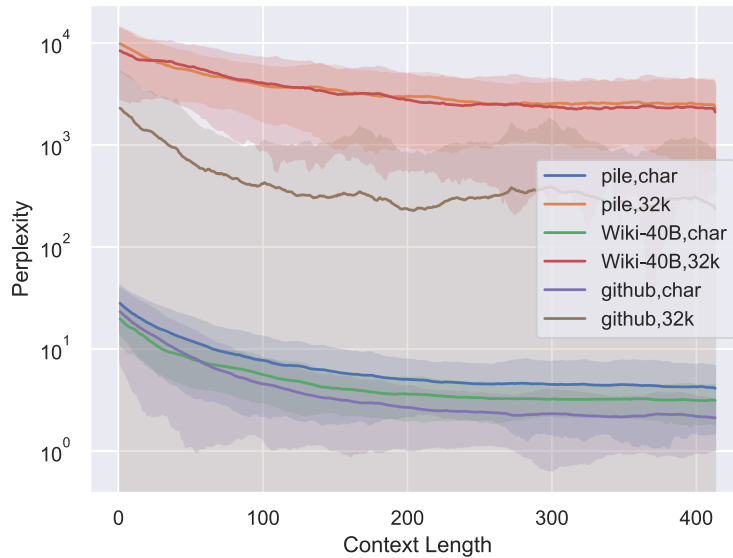

Figure 7: Smoothed Token Perplexity over the Pile, Wiki-40B and Github, with character-level and T5 default vocab

580 Python:

```

581 binary_search() z
582     if (high >= low) z
583         mid = (high + low) // 2
584         if (arr[mid] == x) z
585             return mid
586         if (arr[mid] > x) z
587             high = mid - 1
588             return binary_search()
589         else z
590             low = mid + 1
591             return binary_search()
592     else z
593         return -1
594 def func2() z

```

## 595 E Semantic Deciphering Full Example

596 'crash!' 'aaah!' i looked up from my cup of coffee. 'crash!' - that was  
597 the cafe window. and 'aaah!' - that was kate. people in the cafe shouted.  
598 kate and i ran to the window. there was no one there. then i turned to kate  
599 and put my arm around her. 'are you all right?' i asked. 'yes,' she said.  
600 'i think so.' 'what is it?' some one shouted and a short red-faced man ran  
601 into the room. the man took my arm. 'matt! what are you doing to kate?'  
602 he asked. 'nothing, papa,' kate replied. 'it wasn't him. it was from out  
603 in the street.' the red-faced man looked at the window and then at me. he  
604 turned to his daughter. 'are you ok, kate?' he asked. kate gave him a  
605 little smile. 'yes, i think i am, papa,' she said. then her father spoke  
606 to me. 'sorry, matt. i heard kate and i thought...' 'that's ok, paolo,' i  
607 answered. it was ok. you see, this is soho, in the centre of london. in the  
608 day it's famous for music and films. at night people come and eat and drink

in the restaurants. expensive restaurants and cheap restaurants; italian restaurants and chinese restaurants. and day and night there are internet cafes like the web cafe. in soho you can buy any thing and any one. there are lots of nice people in soho. but there are also lots of people who are not very nice. i know because i live and work here. i often take a drink to a shop or cafe. i'm not rich and famous. and i don't know a lot. but i do know soho. what one here is a drink - restaurants - music - coffee - father the one here that drink is

Example prediction of the lexinvariant with 32k vocabulary train on the Pile:

- coffee. and i

## F Synthetic Reasoning Task

Table 2 shows a variant of the synthetic reasoning task results in Subsection 1, where the symbols are instead sampled proportion to the token frequencies. Although the improvement still generally holds, the standard LM with character-based vocabulary becomes significantly better. We believe that this is because the model can get a significant advantage by guessing among the most common letter.

| Dataset  | Vocab | LookUp Acc |       | Permutation Acc |       |
|----------|-------|------------|-------|-----------------|-------|
|          |       | Standard   | LI    | Standard        | LI    |
| Pile     | char  | 72.80      | 90.95 | 40.63           | 60.47 |
|          | 32k   | 61.20      | 90.95 | 40.55           | 54.55 |
| Wiki-40B | char  | 75.55      | 63.45 | 42.71           | 59.86 |
|          | 32k   | 41.05      | 57.95 | 26.81           | 51.86 |
| Github   | char  | 66.00      | 86.75 | 36.62           | 70.77 |
|          | 32k   | 59.25      | 78.45 | 37.46           | 65.04 |

Table 2: Synthetic Reasoning Tasks (adjusted for token frequencies)

## G Language Models Regularized with Lexinvariance and BIG-bench Results

As described in the main paper, we implement a lexinvariance regularized Model in a way similar to embedding dropout. Note that one problem in implementing it naively by using random Gaussian embeddings and learned embedding in a mixture is that the two would become quickly distinguishable from each other during training since learned embeddings often have larger norms, allowing the model simply ignore the randomized tokens. So instead of using random Gaussian embedding matrices in place of a learned embedding matrix, we explored another approach for training a lexinvariant regularized LM: training a standard LM with learnable embedding matrix over sequences partially applied with a random token permutation  $B_p(x_1, \pi), \dots, B_p(x_1, \pi)$ , where  $B_p(x_i, \pi) = \pi(x_i)$  with probability  $p$  and  $B_p(x_i, \pi) = x_i$  with probability  $1 - p$ . Since each token can be remapped to any other token with equal chance, the produced model should ideally also be lexinvariant when  $p = 1$ , though with no strict guarantees. In practice, we found the models trained this way behave very similarly to models with random Gaussian embedding.

We evaluate our model over BIG-bench tasks where the language model performance scales well, and we prioritize evaluating generative tasks over multiple-choice tasks. Tasks we evaluated on:

gre reading comprehension.mul, linguistics puzzles.gen, linguistics puzzles.gen, rhyming.gen, tellmewhy.gen, simple arithmetic multiple targets json.gen, simple arithmetic json subtasks.gen, disfl qa.gen, arithmetic.gen, bridging anaphora resolution barqa.gen, matrixshapes.gen, sufficient information.gen, logical args.mul, novel concepts.mul, code line description.mul, unnatural in context learning.gen, unit interpretation.mul, english proverbs.mul, general knowledge.mul, geometric shapes.gen, human organs senses.mul, contextual parametric knowledge conflicts.gen, crass ai.mul, auto categorization.gen, penguins in a table.gen, hindu knowledge.mul, english russian proverbs.mul, modified arithmetic.gen, cryobiology spanish.mul, evaluating information essentiality.mul, intent recognition.mul, understanding fables.mul, figure of speech detection.mul, empirical judgments.mul,



648 simple ethical questions.mul, swahili english proverbs.mul, language identification.mul, phrase relat-  
 649 edness.mul, nonsense words grammar.mul, undo permutation.mul, object counting.gen, identify odd  
 650 metaphor.mul, elementary math qa.mul, social iqa.mul, parsinlu qa.mul, metaphor understanding.mul,  
 651 timedial.mul, causal judgment.mul, list functions.gen, implicatures.mul, date understanding.mul,  
 652 codenames.gen, fact checker.mul, physics.mul, abstract narrative understanding.mul, emojis emotion  
 653 prediction.mul, metaphor boolean.mul, strategyqa.gen, ascii word recognition.gen, auto debugging.gen,  
 654 cause and effect.mul, conlang translation.gen, cryptonite.gen, cs algorithms.mul, dyck languages.mul,  
 655 gender inclusive sentences german.gen, hindi question answering.gen, international phonetic alphabet  
 656 transliterate.gen, irony identification.mul, logical fallacy detection.mul, movie dialog same or  
 657 different.mul, operators.gen, paragraph segmentation.gen, parsinlu reading comprehension.gen, repeat  
 658 copy logic.gen, rephrase.gen, simple arithmetic json.gen, simple arithmetic multiple targets json.gen,  
 659 sports understanding.mul, word unscrambling.gen, hyperbaton.mul, linguistic mappings.gen, anachro-  
 660 nisms.mul, indic cause and effect.mul, question selection.mul, hinglish toxicity.mul, snarks.mul,  
 661 vitaminc fact verification.mul, international phonetic alphabet nli.mul, logic grid puzzle.mul, natural  
 662 instructions.gen, entailed polarity.mul, list functions.gen, conceptual combinations.mul, goal  
 663 step wikihow.mul, logical deduction.mul, conlang translation.gen, strange stories.mul, odd one  
 664 out.mul, mult data wrangling.gen, temporal sequences.mul, analytic entailment.mul, disambiguation  
 665 qa.mul, sentence ambiguity.mul, swedish to german proverbs.mul, logical sequence.mul, chess  
 666 state tracking.gen, reasoning about colored objects.mul, implicit relations.mul, riddle sense.mul,  
 667 physical intuition.mul, simple arithmetic json multiple choice.mul, geometric shapes.gen, gem.gen,  
 668 simp turing concept.gen, common morpheme.mul, qa wikidata.gen, international phonetic alphabet  
 669 transliterate.gen, similarities abstraction.gen, rephrase.gen, emoji movie.gen, qa wikidata.gen, word  
 670 sorting.gen, emoji movie.gen, qa wikidata.gen, periodic elements.gen, hindi question answering.gen  
 671 Bellow, we plot the net percentage of tasks improved/deproved in each of the BIG-bench categories,  
 672 out of the tasks that are changed by at least a threshold amount.

## 673 H Compute

674 We use one TPU v3-8 for all our pretraining runs. It takes approximately 23 hours for each pretraining  
 675 run.

## 676 I Broader Impacts

677 Our work primarily provides a scientific exploration and understanding of the properties of lexinvariant  
 678 language models. More broadly, these properties could potentially help improve the robustness,  
 679 generalizability, and reasoning ability of LMs in the future works. In general we don't foresee more  
 680 specific negative societal impacts from this work other than general misuse of language models.

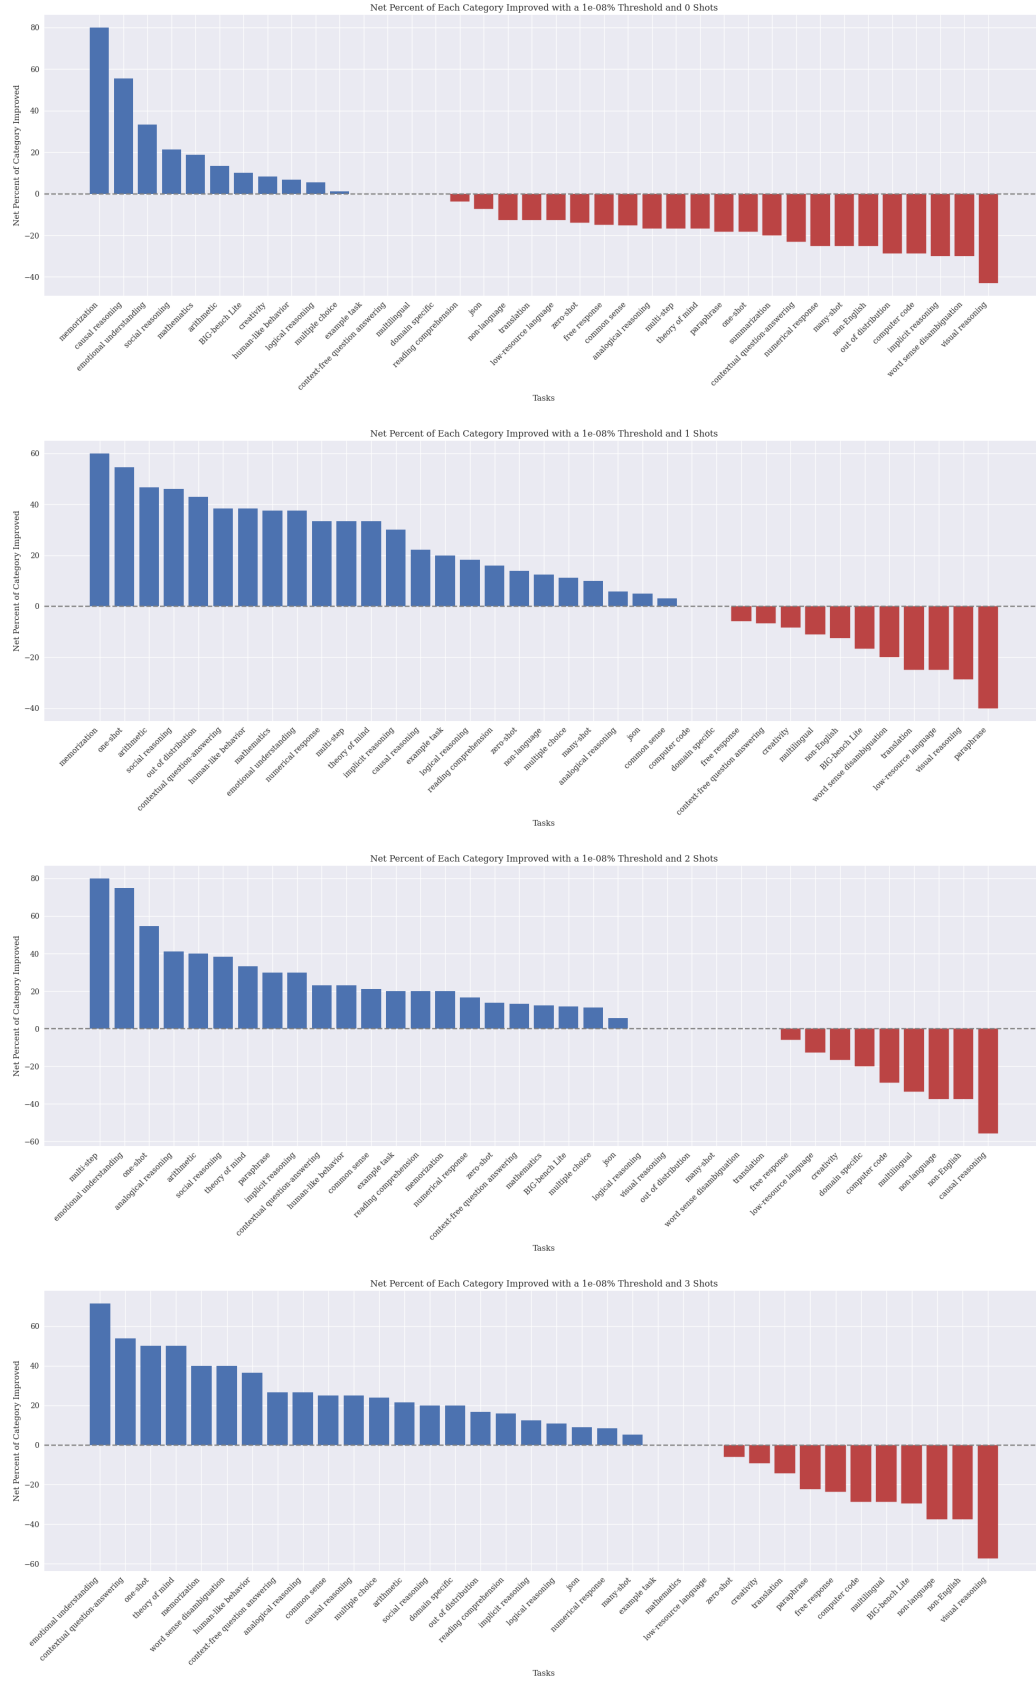

Figure 8: BIG-bench results with 0,1,2 and 3 shots.
